# Supplementary material
Source: MDPI journal article supplement (https://www.mdpi.com/2504-477X/7/7/280)
Supplement: s1 [file s1]

# Enhancing Photocatalytic Pollutant Degradation through S-Scheme Electron Transfer and Sulfur Vacancies in BiFeO<sub>3</sub>/ZnIn<sub>2</sub>S<sub>4</sub> Heterojunctions

Ge-Ge Zheng<sup>1</sup>, Xin Lin<sup>1,2</sup>, Zhen-Xing Wen,<sup>1</sup> Yu-Hao Ding<sup>1</sup>, Rui-Hui Yun<sup>1</sup>, Gaurav Sharma<sup>1,\*</sup>, Amit Kumar<sup>1,\*</sup>, Florian J. Stadler<sup>1,\*</sup>

Table S1 different photocatalyst and their performances to degrade Evans blue

| Materials                                                              | Synthesis method                   | Light source                                            | Photocatalytic degradation                               | Degradation efficiency | Reference        |
|------------------------------------------------------------------------|------------------------------------|---------------------------------------------------------|----------------------------------------------------------|------------------------|------------------|
| Graphene Chemically bonded TiO <sub>2</sub> (G-TiO <sub>2</sub> )      | self-assembly method               | solar light (intensity is 80000 flux)                   | 25 mg photocatalyst into 40 ml 20 mg L <sup>-1</sup> EB  | 100% in 60 min         | [48]             |
| CaFe <sub>2</sub> O <sub>4</sub> NPs                                   | sol-gel method                     | 250 W Xe lamp with 420 nm cut-off ( $\lambda > 420$ nm) | 40 mg photocatalyst into 50 ml 5 mg L <sup>-1</sup> EB   | 98.11% in 90 min       | [49]             |
| Fe <sub>3</sub> O <sub>4</sub> /ZnO NC                                 | co-precipitation method            | 300 W tungsten vapour lamp                              | 50 mg photocatalyst into 50 ml 5 mg L <sup>-1</sup> EB   | 90% in 150 min         | [50]             |
| (Ag,La)co-doped NiCo <sub>2</sub> O <sub>4</sub>                       | sol-gel method                     | visible light                                           | 30 mg photocatalyst into 100 ml 1 mg L <sup>-1</sup> EB  | 98% in 150 min         | [51]             |
| Zn <sub>0.4</sub> Co <sub>0.6</sub> Fe <sub>2</sub> O <sub>4</sub> NPs | combustion method                  | 300 W tungsten lamp                                     | —————                                                    | 93% in 150 min         | [52]             |
| NS-rGO@Sn/Na-doped-TiO <sub>2</sub>                                    | self-assembly method               | UV light                                                | 15 mg photocatalyst into 50 ml 5 mg L <sup>-1</sup> EB   | 92% in 120 min         | [53]             |
| AgI-Ag <sub>2</sub> S@g-C <sub>3</sub> N <sub>4</sub>                  | hydrothermal and pyrolysis methods | visible light                                           | 50 mg photocatalyst into 100 ml 5 mg L <sup>-1</sup> EB  | 98.4% in 120 min       | [54]             |
| BiFeO <sub>3</sub> /ZnIn <sub>2</sub> S <sub>4</sub> (VS)              | microwave hydrothermal method      | 300 W Xe lamp                                           | 20 mg photocatalyst into 100 ml 20 mg L <sup>-1</sup> EB | 99% in 45 min          | <b>This work</b> |

Table S2 ZnIn<sub>2</sub>S<sub>4</sub> based photocatalyst and their performances to degrade Ciprofloxacin

| Materials                                                                          | Synthesis method                        | Light source                                            | Photocatalytic degradation                                | Degradation efficiency | Reference        |
|------------------------------------------------------------------------------------|-----------------------------------------|---------------------------------------------------------|-----------------------------------------------------------|------------------------|------------------|
| Zn-Fe <sub>2</sub> O <sub>3</sub> /ZnIn <sub>2</sub> S <sub>4</sub>                | solvothermal method                     | 300 W Xe lamp with 400 nm cut-off ( $\lambda > 400$ nm) | 10 mg photocatalyst into 50 ml 20 mg L <sup>-1</sup> CIP  | 95.2% in 120 min       | [55]             |
| AgVO <sub>3</sub> /ZnIn <sub>2</sub> S <sub>4</sub>                                | hydrothermal method                     | 250 W Xe lamp with 420 nm cut-off ( $\lambda > 400$ nm) | 50 mg photocatalyst into 100 ml 10 mg L <sup>-1</sup> CIP | 62.5% in 120 min       | [56]             |
| WSe <sub>2</sub> /In <sub>2</sub> S <sub>3</sub> /ZnIn <sub>2</sub> S <sub>4</sub> | hydrothermal method                     | 50 W fluorescent lamp                                   | 10 mg L <sup>-1</sup> CIP                                 | 50.1% in 120 min       | [57]             |
| CQDs-ZnIn <sub>2</sub> S <sub>4</sub> /BiOCl                                       | hydrothermal method                     | 300 W Xe lamp with 420 nm cut-off ( $\lambda > 420$ nm) | 50mg photocatalyst into 100 ml 10 mg L <sup>-1</sup> CIP  | 76.2% in 90 min        | [58]             |
| ZnIn <sub>2</sub> S <sub>4</sub> /CoFe <sub>2</sub> O <sub>4</sub> /bioc-har       | two-step hydro-& solvent-thermal method | 150 W Xe lamp                                           | 25 mg photocatalyst into 50 ml 20 mg L <sup>-1</sup> CIP  | 96.9% in 120 min       | [59]             |
| ZnS-ZnIn <sub>2</sub> S <sub>4</sub>                                               | hydrothermal method                     | 300 W Tungsten/Halogen lamp                             | 10 mg photocatalyst into 10 ml 10 mg L <sup>-1</sup> CIP  | 65% in 75 min          | [60]             |
| BiFeO <sub>3</sub> /ZnIn <sub>2</sub> S <sub>4</sub> (VS)                          | microwave hydrothermal method           | 300 W Xe lamp                                           | 20 mg photocatalyst into 100 ml 20 mg L <sup>-1</sup> CIP | 68% in 90 min          | <b>This work</b> |

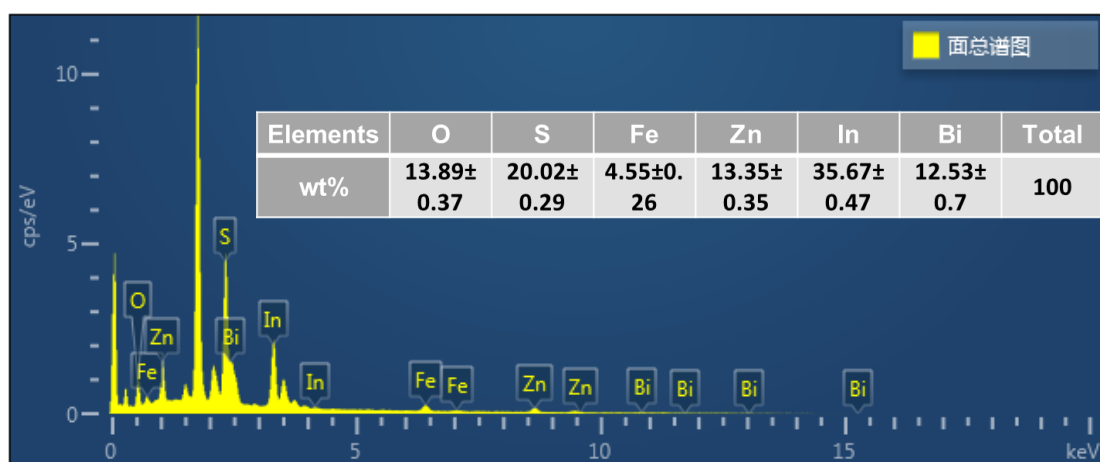

Figure S1: The EDX spectrum elemental composition

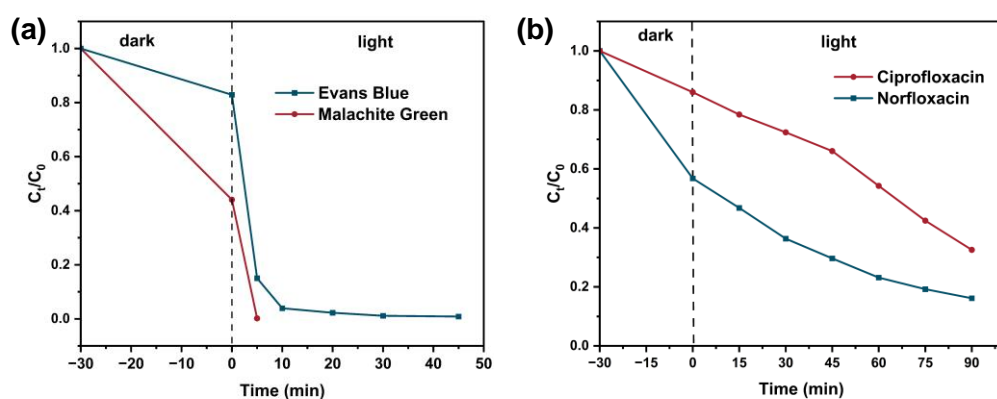

Figure S2: 30BFO/ZISS photocatalytic performance, a) Comparison of azo dyes; b) Comparison of quinolone antibiotics

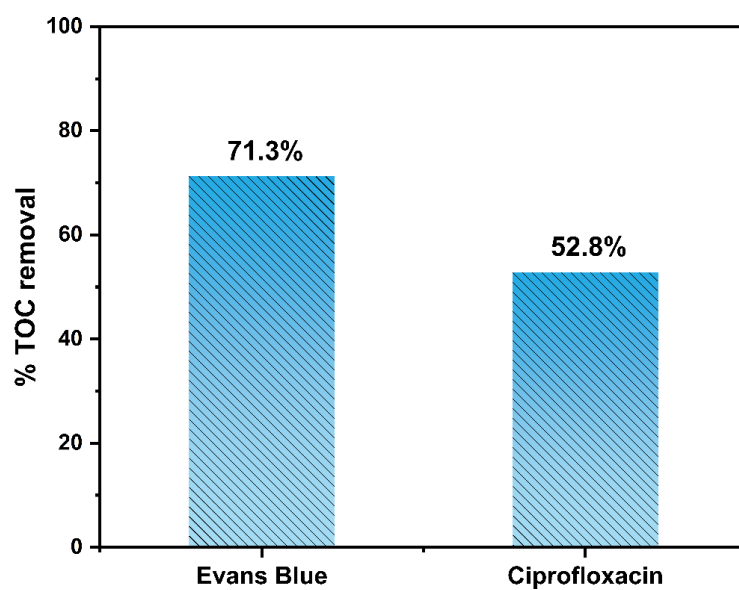

Figure S3: TOC removal for Evans Blue and Ciprofloxacin degradation by 30BFO/ZISS

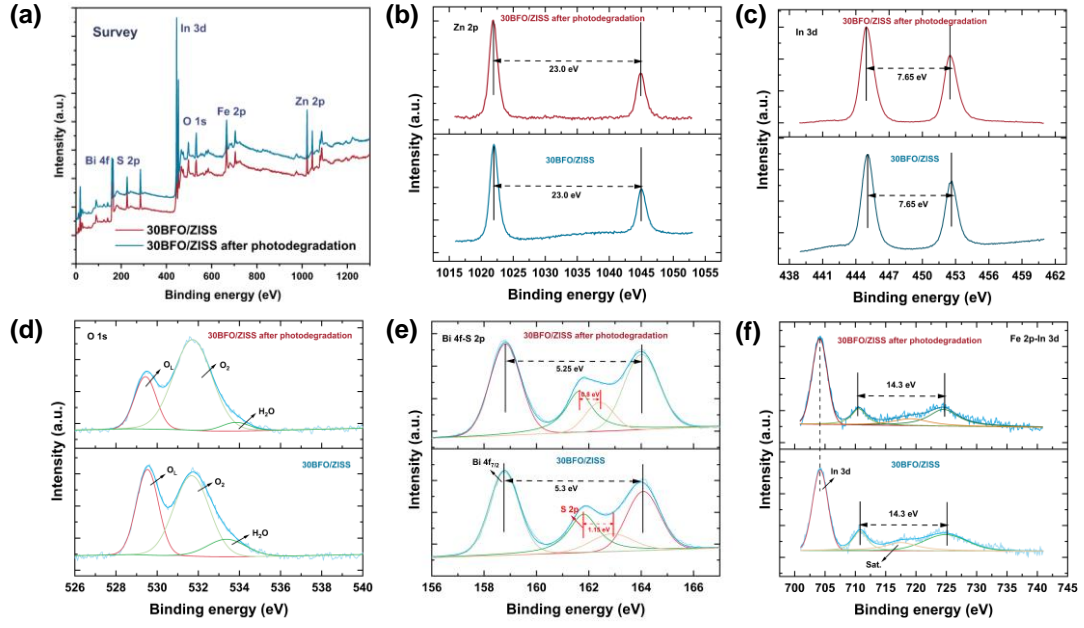

Figure S4: XPS spectra after photocatalytic degradation reaction, a) survey spectrum, b) Zn 2p, c) In 3d, d) O 1s, e) Bi 4f-S 2p, f) Fe 2p-In 3d

## References

48. Kumar K Y, Saini H, Pandiarajan D, et al. Controllable synthesis of TiO<sub>2</sub> chemically bonded graphene for photocatalytic hydrogen evolution and dye degradation[J]. *Catalysis Today*, 2020, 340: 170-177.
49. Adarsha J R, Ravishankar T N, Manjunatha C R, et al. Green synthesis of nanostructured calcium ferrite particles and its application to photocatalytic degradation of Evans blue dye[J]. *Materials Today: Proceedings*, 2022, 49: 777-788.
50. Shashank M, Naik H S B, Nagaraju G, et al. Facile Synthesis of Fe<sub>3</sub>O<sub>4</sub>/ZnO Nanocomposite: Applications to Photocatalytic and Antibacterial Activities[J]. *Journal of Electronic Materials*, 2021, 50: 3557-3568.
51. Priya A S, Geetha D, Karthik K, et al. Investigations on the enhanced photocatalytic activity of (Ag, La) substituted nickel cobaltite spinels[J]. *Solid State Sciences*, 2019, 98: 105992.
52. Wang X, Chen Y. ZnIn<sub>2</sub>S<sub>4</sub>/CoFe<sub>2</sub>O<sub>4</sub> pn junction-decorated biochar as magnetic recyclable nanocomposite for efficient photocatalytic degradation of ciprofloxacin under simulated sunlight[J]. *Separation and Purification Technology*, 2022, 303: 122156.
53. Jithendra Kumara K S, Krishnamurthy G, Walmik P, et al. Synthesis of reduced graphene oxide decorated with Sn/Na doped TiO<sub>2</sub> nanocomposite: a photocatalyst for Evans blue dye degradation[J]. *Emergent Materials*, 2021, 4(2): 457-468.
54. Velmurugan S, Balu S, Palanisamy S, et al. Synthesis of novel and environmental sustainable AgI-Ag<sub>2</sub>S nanospheres impregnated g-C<sub>3</sub>N<sub>4</sub> photocatalyst for efficient degradation of aqueous pollutants[J]. *Applied Surface Science*, 2020, 500: 143991.
55. Liu T, Wang C, Wang M, et al. The improved spatial charge separation and antibiotic removal performance on Z-scheme Zn-Fe<sub>2</sub>O<sub>3</sub>/ZnIn<sub>2</sub>S<sub>4</sub> architectures[J]. *Colloids and Surfaces A: Physicochemical and Engineering Aspects*, 2021, 628: 127226.
56. Li C, Che H, Yan Y, et al. Z-scheme AgVO<sub>3</sub>/ZnIn<sub>2</sub>S<sub>4</sub> photocatalysts: "One Stone and Two Birds" strategy to solve photocorrosion and improve the photocatalytic activity and stability[J]. *Chemical Engineering Journal*, 2020, 398: 125523.
57. Wang X, Lu Q, Sun Y, et al. Fabrication of novel pnp heterojunctions ternary WSe<sub>2</sub>/In<sub>2</sub>S<sub>3</sub>/ZnIn<sub>2</sub>S<sub>4</sub> to enhance visible-light photocatalytic activity[J]. *Journal of Environmental Chemical Engineering*, 2022, 10(5): 108354.
58. Jiang R, Wu D, Lu G, et al. Modified 2D-2D ZnIn<sub>2</sub>S<sub>4</sub>/BiOCl van der Waals heterojunctions with CQDs: Accelerated charge transfer and enhanced photocatalytic activity under vis-and NIR-light[J]. *Chemosphere*, 2019, 227: 82-92.
59. Wang X, Chen Y. ZnIn<sub>2</sub>S<sub>4</sub>/CoFe<sub>2</sub>O<sub>4</sub> p-n junction-decorated biochar as magnetic recyclable nanocomposite for efficient photocatalytic degradation of ciprofloxacin under simulated sunlight[J]. *Separation and Purification Technology*, 2022, 303: 122156.
60. Janani R, Melvin A A, Singh S. Facile one pot in situ synthesis of ZnS-ZnIn<sub>2</sub>S<sub>4</sub> composite for improved photocatalytic applications[J]. *Materials Science in Semiconductor Processing*, 2021, 122: 105480.
